# Supplementary material for: Multi-Source Remote Sensing-Based Reconstruction of Glacier Mass Changes in Southeastern Tibet Since the 21st Century
Source: Copernicus journal article supplement (doi:10.5194/egusphere-2025-1772), 2025-05-28
Supplement: Supplementary file [file egusphere-2025-1772-AC5-supplement.pdf]

## General Comments

C: The study by Li et al. aims at presenting a method that allows the automated mapping of glacier extents in a challenging region using Google Earth Engine at high temporal resolution, up to annually from Sentinel-2. They used the results to consider area changes when calculating glacier mass balance. If the mapping had worked, this would have been an important study to improve related results also for other regions in the world. Unfortunately, the outcome of the mapping is not useful for any assessment. In this regard I want to acknowledge that the authors have provided the results of their mapping effort in the supplemental material. Without this, my evaluation would have been different as the paper is otherwise well written and the idea to just use all data available and combine it for the best possible result is fine. However, the largely arbitrary area changes from dataset to dataset (for individual glaciers partly larger than 50% from year to year) are obvious and glaciologically impossible. The authors mention that there are the usual problems with debris cover, clouds and shadow, but they have seemingly not recognized how large and arbitrary the variability is and that their method does not produce meaningful results.

R: We sincerely thank you for your professional and constructive comments. In the original manuscript, we did not clearly state the scope and limitations of our study, and some statements inadvertently overstated the capabilities of our automated approach. Our study does not aim to reach the precision of the Randolph Glacier Inventory (RGI), which cannot realistically be achieved through fully automated mapping alone. Instead, our focus is on developing an automated method to extract multi-temporal glacier outlines and exploring how repeated glacier area measurements contribute to understanding glacier mass balance dynamics. We also recognize that producing annual glacier area results is overly ambitious given the limitations of available imagery. In response, we have aggregated results to five-year intervals in the revised manuscript. This five-year aggregation provides more reasonable estimates of glacier area change rates across multiple periods, which are essential for improving glacier mass balance calculations. In this context, long-term trends are the priority, while short-term

fluctuations are of secondary importance. We fully appreciate your insights and have carefully addressed each comment, making corresponding improvements throughout the manuscript. The revisions clarify the study's scope and limitations and present the results in a more accurate, balanced, and transparent manner. Below, we provide a detailed, point-by-point response to your suggestions.

C: Neither the unrealistic area increase by about 500 km<sup>2</sup> (estimated from Fig. 8, numbers for individual years are not provided) from 2019 to 2022 (naming it as a 'consistent decline' in L387), nor the sudden strong increase from 2016 to 2017 is discussed or considered as unrealistic. Instead, the authors correlate glacier elevation changes (wrongly labelled as 'Glacier Thickness' in Fig. 8) with glacier area changes as they assume there is a correlation (L407) and think that the correlation can be used as a validation (L413) of their (wrong) glacier areas. In fact, area changes are mostly driven by the ice thickness distribution along the glacier perimeter (thus depending on the shape of the glacier cross-profile) and are a longer-term response to changes in flow dynamics (glaciers have a response time). Hence, also the follow on analysis is a bit strange. In this regard, it is also unclear to me why the authors rely on results from Cryosat and ICESat (with their diverse range of issues) for such small glaciers instead of the Hugonnet et al. (2021) dataset that is widely used? As this dataset is not even mentioned in the comparison Table 1, I wonder why. Is the dataset too bad in quality?

R: We appreciate your suggestions. We acknowledge that the initial glacier extent results showed unrealistic year-to-year variability. To address this, we re-examined the classification outputs on a glacier-by-glacier basis and applied post-processing to flag and remove implausible area changes, including abrupt fluctuations or geometrically inconsistent outlines. Invalid outlines were replaced with the closest temporally consistent results. After these adjustments, the overall mapping is more stable, although uncertainties remain, particularly for complex glaciers. The results should therefore be interpreted primarily as a methodological demonstration rather than a comprehensive

We appreciate your suggestions. We acknowledge that the initial glacier extent results exhibited unrealistic interannual variations. To address this issue, we replaced the annual data outputs with five-year intervals and re-examined the classification outputs for each glacier individually. Following these adjustments, the overall mapping results

have become more stable, with no significant fluctuations observed. We also recognize that the apparent area increase of  $\sim 500 \text{ km}^2$  between 2019 and 2022, and the sudden jump from 2016 to 2017, were unrealistic. These anomalies arose from limitations in the available imagery, including cloud cover, topographic shadows, and seasonal snow, which affected the quality of automatically derived outlines. New findings indicate that growth no longer exists. Figures and analyses have been updated. Regarding Fig. 8, we corrected the label from “Glacier Thickness” to “Glacier Elevation Change.” We also removed any suggestion that the observed correlation between glacier elevation change and area change constitutes a form of validation, as glacier area and elevation changes are not necessarily synchronous or directly correlated from a glaciological perspective. Finally, we have included the Hugonnet et al. (2021) dataset for comparison, which was previously overlooked. CryoSat, ICESat, and ICESat-2 remain essential for our study because they provide a complete temporal series in the study region, which is critical for analyzing the contribution of dynamic glacier area changes to glacier mass balance. This rationale has been clarified in the revised manuscript.

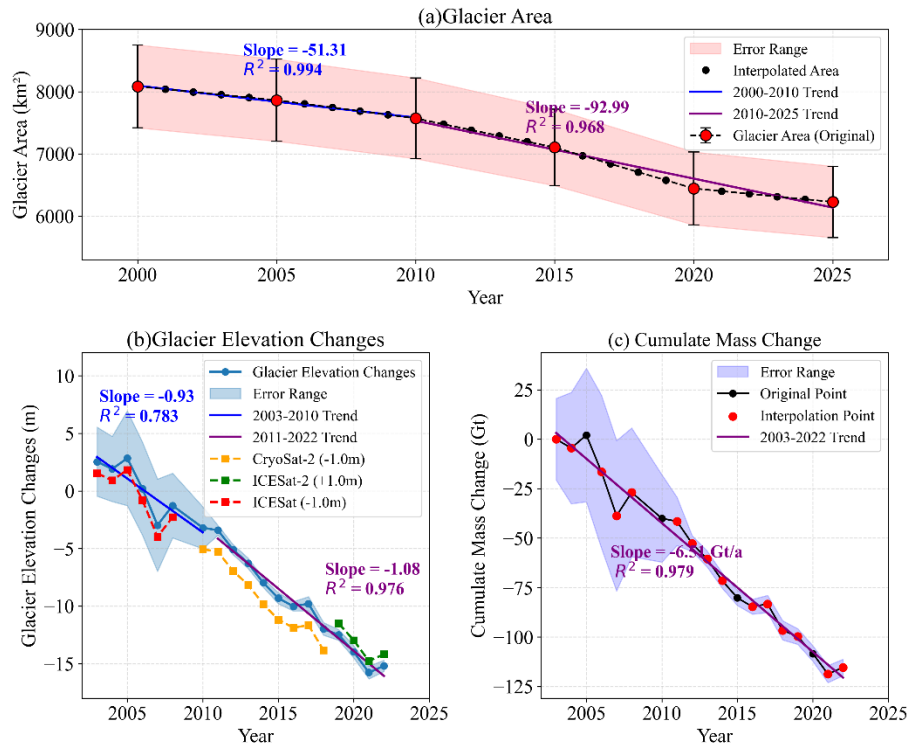

**Fig 8 (a) Time series of total glacier area in the southeastern Tibetan Plateau from 2000 to 2025. (b) Glacier thickness changes derived from three generations of altimetry satellites (ICESat, CryoSat-2, and ICESat-2). Data from different satellites were merged to produce a continuous thickness time series. Vertical offsets were applied for clarity in visualization. Light blue shading represents the uncertainty in glacier thickness, while light red shading**

**indicates the uncertainty in glacier area. (c) Glacier mass changes considering the dynamically updated glacier areas, reflecting the influence of year-to-year variations in glacier extent.**

C: The very short results section (it has just 14 lines) mentioned the Kappa coefficient and overall accuracy along with three images showing outline overlays. I am aware that these statistical accuracy measures are frequently used in remote sensing studies to present the accuracy, but in my view they can be the result of anything and do not allow to obtain meaningful conclusions about the ‘robustness and reliability of the classification approach’. At least for glaciers they do not work, as nicely confirmed here by the largely arbitrary results of the glacier mapping. The quality of mapped glacier extents can be shown by a) outline overlays and b) the sum of commission and omission errors (false positives and false negatives) divided by the common area. But as the former have been removed by the masking with RGI 7.0, I am unclear if the measures can be used here at all?

R: We appreciate your comment and agree that traditional statistical accuracy metrics can be misleading for glacier mapping due to complex glacier morphology and seasonal effects. To better assess classification reliability, we supplemented these metrics with comparisons to manually interpreted reference outlines and with spatial consistency checks across multiple time points. Together, these approaches provide a more robust evaluation of the results. This clarification has been added to the revised manuscript.

*“The annual classification results were evaluated using the confusion matrix method, showing high accuracy with Kappa coefficients above 93% and overall accuracy exceeding 94%. The F1 score for glacier extraction in 2020 was 95.5%, with Precision of 94.5% and Recall of 96.5%, demonstrating the robustness of the random forest classifier. The classification confusion matrix indicates strong agreement between predicted and actual classes, with minor misclassifications primarily occurring between debris-covered glaciers, shadowed regions, and bare surfaces.” (Line392-397)*

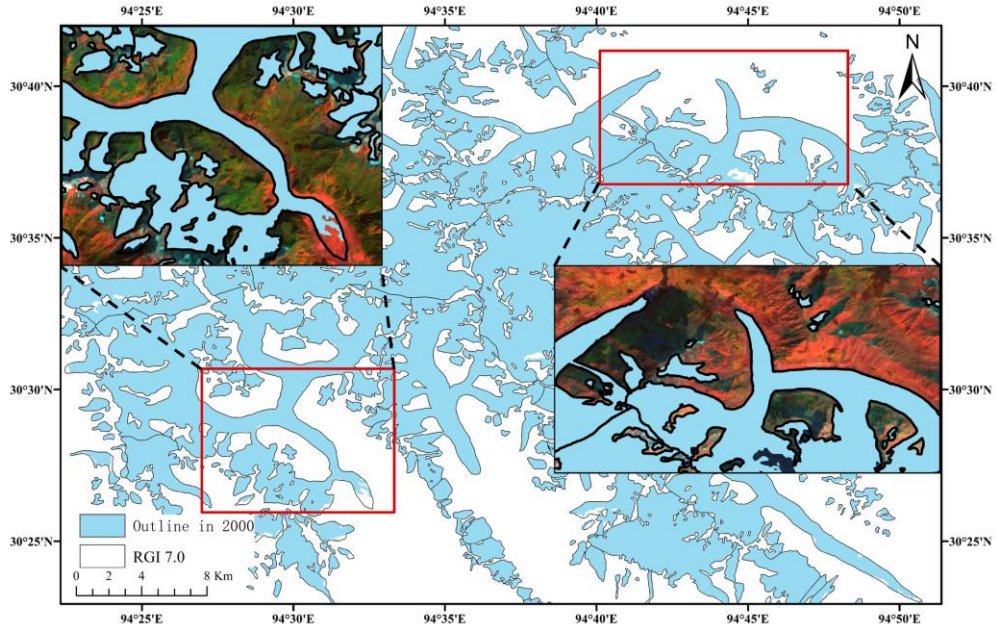

**Fig 7** Glacier boundary at 2000 and RGI7.0 glacier boundary.

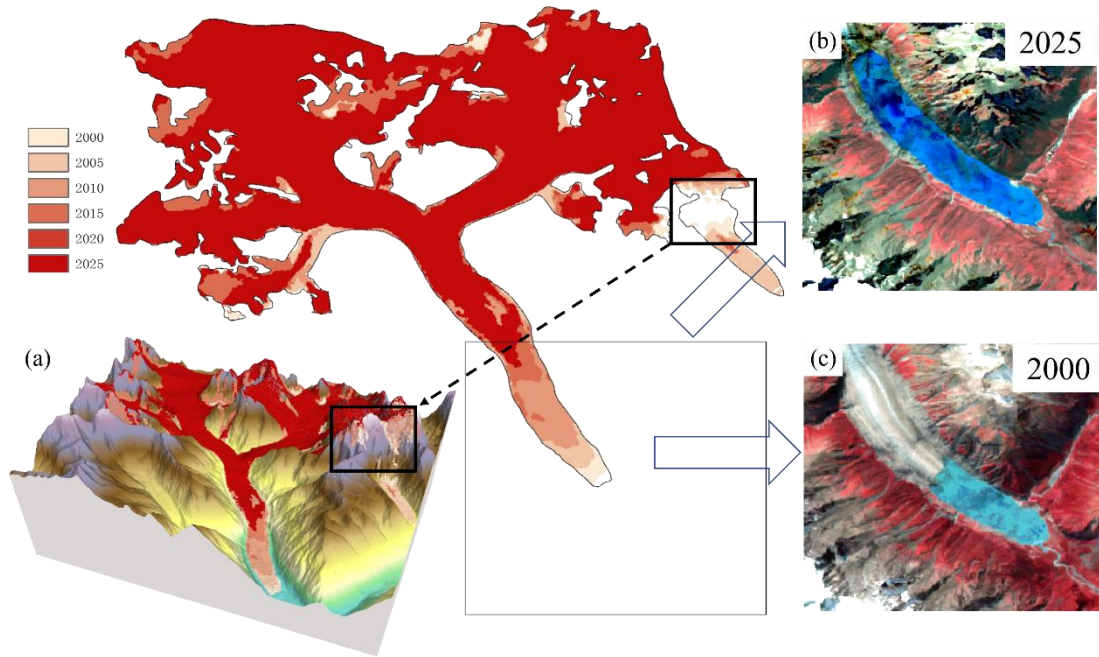

**Fig 10** Extraction results of Glacier 10222 from 2000 to 2025. The main panel shows the glacier delineation over the period. (a) Three-dimensional view overlaid with topographic information. (b) and (c) High-resolution satellite imagery of the highlighted region in 2000 and 2025, respectively, showing terminus retreat and proglacial lake expansion.

C: I see missing debris-covered glacier parts and that large regions in shadow are sometimes missing. Hence, intensive manual editing would be required before resulting outlines could be used for change assessment. The statement that glaciers ‘are well identified’ (L377) seems misleading in this regard. Although the year 2000 dataset is likely the most complete regarding shadow and debris mapping, showing a region where the method does not work and discussing it would have been more helpful. One can see the problems of the classification a little bit for the 2022 outlines of the right glacier in the upper left panel [please name them properly a), b) and c)] of Fig. 8, but the image is very dark (what about some contrast stretching?), the lines are hard to see (also the red outlines on a reddish background in the insets of Fig. 7 are barely visible) and the wrong mapping results are not really discussed.

R: We are grateful for your comment. We acknowledge the limitations of our approach, as accurately identifying debris-covered glaciers remains challenging. The 2000 dataset achieved relatively high accuracy because sample selection relied on RGI 7.0, enabling precise delineation of debris-covered glaciers. For subsequent years, limited experience led to suboptimal sample selection, resulting in substantial omission of debris-covered glaciers. Reducing reliance on manual sample selection will be a key focus of future work. We also recognize that the original figure suffered from low contrast, making some lines difficult to discern, particularly the red outlines on reddish backgrounds in the insets of Fig. 6. In the revised manuscript, we applied contrast stretching and adjusted the color schemes to improve visibility. Additionally, the discussion on mapping inaccuracies has been expanded to clarify the sources of misclassification and their potential impacts on the results. It is noteworthy that the results of the five-year cycle have significantly improved, with considerable progress made in the extraction of tabular deposits.

We appreciate the reviewer’s comment. We acknowledge the limitations of our approach, as accurately identifying debris-covered glaciers remains challenging. The 2000 dataset achieved relatively high accuracy because sample selection relied on the RGI 7.0 inventory, allowing precise delineation of debris-covered glaciers. In subsequent years, limited experience led to suboptimal sample selection, resulting in substantial omission of debris-covered glaciers. Notably, our updated five-year interval results show significant improvements in extracting debris-covered glaciers; however, reducing reliance on manual sample selection will remain a key focus for future work.



We also recognized that the original figures suffered from low contrast, making some lines difficult to discern, particularly the red outlines on reddish backgrounds in the insets of Figure 6. In the revised manuscript, contrast stretching and optimized color schemes were applied to improve visibility. Additionally, the discussion on mapping inaccuracies has been expanded to clarify the sources of misclassification and their potential impacts on the results.

C: A final major point of concern is the general set-up of the study. First, the elevation change datasets are introduced in the Discussion Section 5.2 rather than in Sections 2.2 and 3. Their description is thus very short and the processing method unclear (e.g. how has the radar penetration into snow been corrected?). This can likely easily be adjusted. The motivation to determine annual area changes is mentioned, but not critically discussed. Even when the resulting glacier outlines would have been correct, a one-pixel (two pixels for debris-covered regions) uncertainty at 30 m resolution relates to a 30 and 60 m location uncertainty of the outline. With an assumed annual terminus retreat of 5 to 10 m / year (much less around the perimeter), one has to wait several years before new outlines make sense compared to uncertainties. But here the mapped termini could be wrong by several km, so change assessment is not an option. To make my major objection of the high variability in the mapping results clearer, I have added all glacier maps (setting the no data value to 0 before) and received a very colourful picture. On the last two pages of this review, I show a few examples for illustration. If the mapping had been correct, colours should only appear near the terminus and around the perimeter. As a note, this is just the result of a simple adding without a timeline, not revealing the partly strong year-to-year jumps in mapped glacier areas.

R: We appreciate your suggestions. For clarity, we specify that the datasets were derived from previous studies, and no additional processing was performed in our work. We also recognize that the original approach was somewhat aggressive in interpreting short-term glacier changes. Considering the positional uncertainties at 30 m resolution, we have revised our analysis to use 5-year intervals between mapped glacier outlines. This adjustment reduces the relative impact of positional errors and provides a more robust basis for assessing glacier changes over time.

C: In conclusion, this brute-force mapping using sophisticated image processing without a sufficient understanding of the mapped subject (glaciers) and how it should change over time is not recommended. When being harsh, I would ask the authors to

please first learn the basics about glaciers and how they work, then proceed with the user needs (are annual updates really required?) and then do the mapping. A bit less harsh I would ask the authors to first get the mapping right for one year before applying it to several years. When glacier area changes are mostly due to changes in the mapping results rather than real changes, there is no need to perform change assessment. In my view, it is possible to publish a study revealing that a method has not worked. However, in this case an honest discussion and illustration of the problems is required to be helpful for future studies. Concluding that this study provides ‘effective support for future glacier inventories’ (L482) is in my view highly misleading.

R: We appreciate your suggestion and fully acknowledge that our original approach, relying heavily on automated image processing, may not achieve perfect accuracy for individual glacier outlines. Nevertheless, our primary goal is to assess long-term glacier change trends, for which occasional single-period uncertainties have a limited impact.

## **Specific comments**

I do not comment here on all details of the study, but include some general remarks:

C: Providing area changes in km<sup>2</sup> and mass changes in Gt (sure to use 900 rather than 850 kg/m<sup>3</sup> in this region?) are not useful as they are incomparable across regions. In future studies, please give relative area changes in % and the related change rates per year for area and specific mass changes per unit area and year for mass balance (and please do not use the latter to ‘validate’ the former, this makes glaciologically little sense).

R: We appreciate this suggestion. While absolute glacier mass changes in Gt are retained to provide a direct sense of regional mass loss, we agree that glacier area changes are more informative when expressed in relative terms. In the revised manuscript, glacier area changes are reported as percentages relative to the base year, with corresponding annual rates. Glacier mass changes remain in Gt, calculated using a regional ice density of 900 kg/m<sup>3</sup> (Zhao et al., 2022).

*“Overall, glaciers in the southeastern Tibetan Plateau underwent a steady decline from 8083.34 ± 664.92 km<sup>2</sup> in 2000 to 6228.79 ± 572.71 km<sup>2</sup> in 2025. Relative to 2000, this represents a cumulative glacier area loss of approximately 22.9 ± 3.6%. Accounting*



*for measurement uncertainties, the glaciers retreated at an average rate of  $80.51 \pm 10.51 \text{ km}^2 \text{ yr}^{-1}$  ( $\sim 1.0 \pm 0.13\% \text{ yr}^{-1}$  relative to 2000). The retreat rate accelerated after 2010, rising from  $51.31 \pm 16.81 \text{ km}^2 \text{ yr}^{-1}$  (2000–2010;  $\sim 0.63 \pm 0.21\% \text{ yr}^{-1}$  relative to 2000) to  $92.99 \pm 17.67 \text{ km}^2 \text{ yr}^{-1}$  (2010–2025;  $\sim 1.15 \pm 0.22\% \text{ yr}^{-1}$  relative to 2000), highlighting an increasing pace of glacier loss in recent years.” (Line417-422)*

C: Please carefully check text errors. Often spaces are missing or units are wrong (area in km instead of km<sup>2</sup>, volume in m instead of m<sup>3</sup>). Also the citation style is strange. For example, in L398 it is written ‘Ye et al. (Quinghua, 2019 ...)reported ...’ So is it now Ye or Quinghua and why is it first et al. and then without et al.? In the reference section it is actually Quinhua, Y.E., again different. Correct would have been to write: ‘The datasets by Qunighua (2019 and 2020) reported ...’ or in L409: ‘The results of Jakob et al. (2021)’ ... . As a small note, the References Section becomes more readable when indenting the text from the second line a bit, making it ‘hanging’.

C: Figure captions: I suggest inserting a . or : after the figure number, e.g. ‘Figure 1: Study area’

C: Table 1: I think the brackets around the authors of the cited studies are not required.

R: We appreciate your comments. We have carefully checked the manuscript for text errors, correcting missing spaces, unit inconsistencies, and citation issues. All references have been verified and standardized. Figure captions now include a colon after the figure number, and Table 1 has been reformatted to remove unnecessary brackets around author names. A comprehensive review of all text, figures, tables, and references has been completed to ensure consistency and clarity throughout the manuscript.

C: L261: Figure 4: The blue and red lines and squares are difficult to see against the dark background. Also the annotations and legends of the insets are partly hard to see. It needs also to be explained what is what. Just writing in the text that types can be clearly distinguished is a bit thin. The same applies to all panels in Fig. 5. The panels are too small, the legends are unreadable and it is unclear what is what.

R: We appreciate your suggestion. We have enhanced the visibility of Figures 4 and 5 by adjusting line and marker colors to higher-contrast shades, enlarging the panels, and

ensuring that all legends and annotations are clearly readable. The captions and main text have also been revised to explicitly explain the meaning of each line, marker, and panel, making the figures fully interpretable independently of the text.

C: L306: I am also a bit unclear what Fig. 5 should tell me? That many datasets have been used and none of them shows glaciers clearly?

R: We appreciate your suggestion. Figure 5 illustrates all the features used in the classification, showing the variety of datasets incorporated and how each contributes to glacier mapping.

C: L390: Incomplete caption. Please note that sudden area gains as shown in Figure 5 (and 6) are glaciologically not possible. This is not how glaciers work.

R: We acknowledge your point. Based on our new findings, this abnormal growth no longer exists. (Fig8-10)

C: L414: Figure 9b: This comparison makes glaciologically no sense.

R: We appreciate your suggestion. This part has been removed.

C: L470: This is correct, but the NDSI has been shown to be very sensitive to path radiance in the green band, creating problems with ice in shadow. Additional classification problems are introduced when using the analysis ready reflectance datasets instead of the raw data, which allow for a better separation of details when the SNR is low.

R: We appreciate your suggestion. We used decision-level fusion to address this issue, which removes cases where either Landsat or Sentinel-2 images are affected by shadows on the ice.

C: L471: As far as I can see it, most gaps are due to not mapping debris-covered glacier parts.

R: We appreciate your suggestion. Based on your sample, we have generated a new glacier retreat map showing significant improvement over previous results. Areas exhibiting substantial changes have been markedly reduced, and the overall pattern is

relatively stable. Following the demo area you provided, we show the results of the initial modifications to the area:

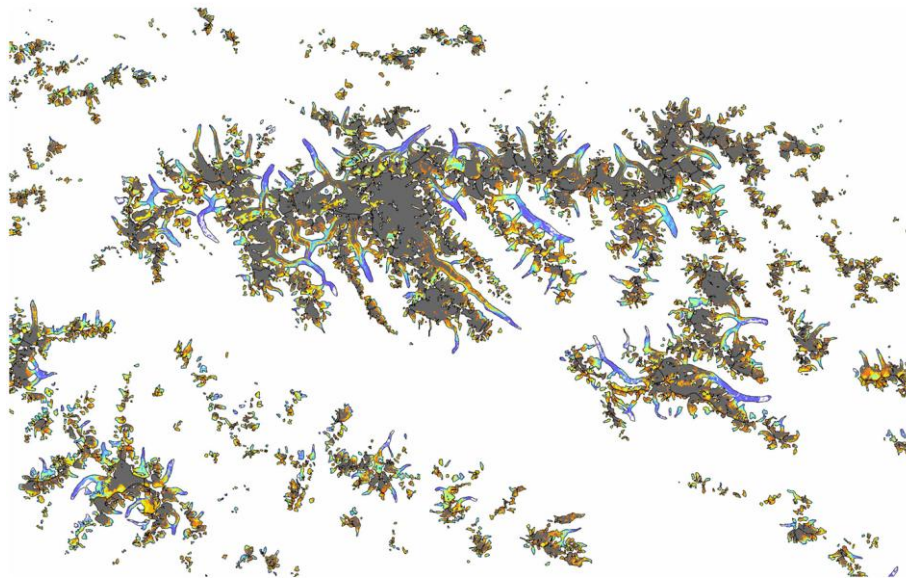

**Fig example3**

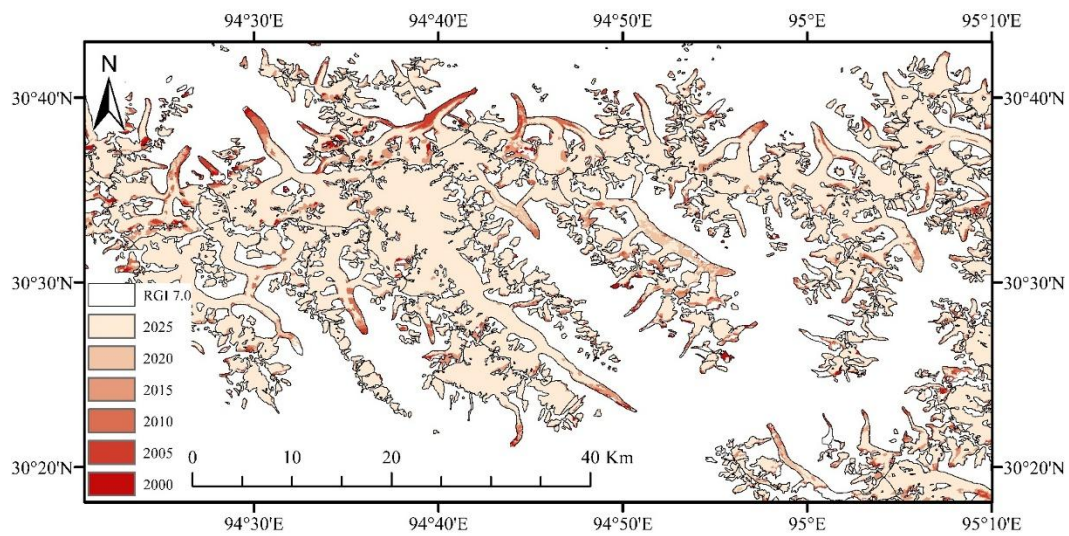

**Figure 1 Large-scale glacier retreat in the southeastern Tibetan Plateau from 2000 to 2025.**  
The figure shows glacier boundaries over time, highlighting that retreat primarily occurs in the terminus regions, while high-elevation accumulation zones remain relatively stable.
